# Supplementary material
Source: PubMed Central journal article supplement (PMC8095234)

## Appendix. Digital Device Type Images

|                                                                                                     |                                                                                                   |
|-----------------------------------------------------------------------------------------------------|---------------------------------------------------------------------------------------------------|
| <p>JUUL</p>        | <p>Pod Vape</p>  |
| <p>Cigalike</p>    | <p>Box-Mod</p>   |
| <p>Vape Pen</p>  |                                                                                                   |

Supplement: ntaa232_suppl_supplementary_appendix.pdf [file ntaa232_suppl_supplementary_appendix.pdf]
